# Supplementary material for: Multiparametric [11C]Acetate positron emission tomography-magnetic resonance imaging in the assessment and staging of prostate cancer
Source: PubMed Central journal article supplement (PMC5515396; doi:10.1371/journal.pone.0180790), 2017-07-18
Supplement: pone.0180790.s002.pdf [file pone.0180790.s002.pdf]

**S1 Table:** Detailed histopathological results of false-negative and false-positive lesions

|                         | <b>Imaging modality</b>                  | <b>False positives</b> | <b><i>n</i></b> | <b>False negatives</b> | <b><i>n</i></b> |
|-------------------------|------------------------------------------|------------------------|-----------------|------------------------|-----------------|
| <b>Single parameter</b> | <b>T2w<sup>1</sup></b>                   | 3 Prostatitis          | <b>7</b>        | 1 GS 6 (3+3)           | <b>2</b>        |
|                         |                                          | 4 BPH <sup>6</sup>     |                 | 1 GS 8 (4+4)           |                 |
|                         | <b>DWI<sup>2</sup></b>                   | 4 Prostatitis          | <b>9</b>        | 1 GS 6 (3+3)           | <b>2</b>        |
|                         |                                          | 5 BPH                  |                 | 1 GS 8 (4+4)           |                 |
|                         | <b>3D <sup>1</sup>H-MRSI<sup>3</sup></b> | 4 Prostatitis          | <b>7</b>        | 8 GS 6 (3+3)           | <b>14</b>       |
|                         |                                          | 3 BPH                  |                 | 5 GS 7 (4+3)           |                 |
|                         |                                          |                        |                 | 1 GS 8 (4+4)           |                 |
|                         | <b>DCE<sup>4</sup></b>                   | 4 Prostatitis          | <b>7</b>        | 5 GS 6 (3+3)           | <b>9</b>        |
|                         |                                          | 3 BPH                  |                 | 3 GS 7 (4+3)           |                 |
|                         |                                          |                        |                 | 1 GS 8 (4+4)           |                 |
|                         | <b>PET<sup>5</sup></b>                   | 5 Prostatitis          | <b>11</b>       | 4 GS 6 (3+3)           | <b>9</b>        |
|                         |                                          | 6 BPH                  |                 | 4 GS 7 (4+3)           |                 |
|                         |                                          | 1 GS 8 (4+4)           |                 |                        |                 |
| <b>Two parameters</b>   | <b>T2w and DWI</b>                       | 3 Prostatitis          | <b>5</b>        | 1 GS 6 (3+3)           | <b>2</b>        |
|                         |                                          | 2 BPH                  |                 | 1 GS 8 (4+4)           |                 |
|                         | <b>T2w and <sup>1</sup>H-MRSI</b>        | 2 Prostatitis          | <b>5</b>        | 8 GS 6 (3+3)           | <b>14</b>       |
|                         |                                          | 3 BPH                  |                 | 5 GS 7 (4+3)           |                 |
|                         |                                          |                        |                 | 1 GS 8 (4+4)           |                 |
|                         | <b>T2w and DCE</b>                       | 2 Prostatitis          | <b>4</b>        | 4 GS 6 (3+3)           | <b>9</b>        |
|                         |                                          | 2 BPH                  |                 | 4 GS 7 (4+3)           |                 |
|                         |                                          |                        |                 | 1 GS 8 (4+4)           |                 |
| <b>T2w and PET</b>      | 3 Prostatitis                            | <b>5</b>               | 6 GS 6 (3+3)    | <b>11</b>              |                 |
|                         |                                          |                        | 4 GS 7 (4+3)    |                        |                 |

|                                           |                                                  |               |          |              |          |
|-------------------------------------------|--------------------------------------------------|---------------|----------|--------------|----------|
|                                           |                                                  | 2 BPH         |          | 1 GS 8 (4+4) |          |
| <b>Three parameters</b>                   | <b>T2w, DWI and <sup>1</sup>H-MRSI</b>           | 3 Prostatitis | <b>6</b> | 1 GS 6 (3+3) | <b>2</b> |
|                                           |                                                  | 3 BPH         |          | 1 GS 8 (4+4) |          |
|                                           | <b>T2w, DWI and DCE</b>                          | 3 Prostatitis | <b>7</b> | 1 GS 6 (3+3) | <b>2</b> |
|                                           |                                                  | 4 BPH         |          | 1 GS 8 (4+4) |          |
|                                           | <b>T2w, DWI and PET</b>                          | 4 Prostatitis | <b>9</b> | 1 GS 6 (3+3) | <b>2</b> |
|                                           |                                                  | 5 BPH         |          | 1 GS 8 (4+4) |          |
| <b>Four parameters</b>                    | <b>T2w, DWI, <sup>1</sup>H-MRSI and DCE</b>      | 3 Prostatitis | <b>7</b> | 1 GS 6 (3+3) | <b>2</b> |
|                                           |                                                  | 4 BPH         |          | 1 GS 8 (4+4) |          |
|                                           | <b>T2w, DWI, <sup>1</sup>H-MRSI and PET</b>      | 4 Prostatitis | <b>8</b> | 1 GS 6 (3+3) | <b>2</b> |
|                                           |                                                  | 4 BPH         |          | 1 GS 8 (4+4) |          |
|                                           | <b>T2w, DWI, DCE and PET</b>                     | 3 Prostatitis | <b>7</b> | 1 GS 6 (3+3) | <b>2</b> |
|                                           |                                                  | 4 BPH         |          | 1 GS 8 (4+4) |          |
| <b>MP [<sup>11</sup>C]Acetate PET-MRI</b> | <b>T2w, DWI, <sup>1</sup>H-MRSI, DCE and PET</b> | 3 Prostatitis | <b>7</b> | 2 GS 6 (3+3) | <b>4</b> |
|                                           |                                                  |               |          | 1 GS 7 (4+3) |          |
|                                           |                                                  | 4 BPH         |          | 1 GS 8 (4+4) |          |

<sup>1</sup> T2-weighted MRI

<sup>2</sup> diffusion-weighted imaging

<sup>3</sup> three-dimensional proton MR spectroscopic imaging

<sup>4</sup> dynamic contrast-enhanced MRI

<sup>5</sup> positron emission tomography

<sup>6</sup> benign prostatic hyperplasia
